# Supplementary material
Source: publisher figshare collection journal article supplement (https://sage.figshare.com/ndownloader/files/23146151)
Supplement: Supplementary file 1 [file 23146151]

Table S1 The results of univariate analyses on differences between different types of workers for fathers.

|                                            |                                  | No shift     | Regular      | Rotating     | Irregular    | Total        |
|--------------------------------------------|----------------------------------|--------------|--------------|--------------|--------------|--------------|
| Total number of workers                    |                                  | 78 (17.3%)   | 149 (33.0%)  | 119 (26.3%)  | 106 (23.5%)  | 452 (100.0%) |
| <b>Demographic Variables</b>               |                                  |              |              |              |              |              |
| Single Parents <sup>a</sup> NS             | Married parents                  | 71 (91.0%)   | 131 (87.9%)  | 110 (92.4%)  | 91 (85.8%)   | 403 (89.2%)  |
|                                            | Single parents                   | 7 (9.0%)     | 18 (12.1%)   | 9 (7.6%)     | 15 (14.2%)   | 49 (10.8%)   |
| Income <sup>a</sup> *                      | ≥\$800/week                      | 72 (92.3%)   | 134 (89.9%)  | 115 (96.6%)  | 91 (85.8%)   | 412 (91.2%)  |
|                                            | <&800/week                       | 6 (7.7%)     | 15 (10.1%)   | 4 (3.4%)     | 15 (14.2%)   | 40 (8.8%)    |
| Tertiary Education <sup>a</sup> ***        | Bachelor's or higher             | 50 (64.1%)   | 38 (25.5%)   | 28 (23.5%)   | 27 (25.5%)   | 143 (31.6%)  |
|                                            | Below bachelor's                 | 28 (35.9%)   | 111 (74.5%)  | 91 (76.5%)   | 79 (74.5%)   | 309 (68.4%)  |
| Number of Children <sup>a</sup> NS         | ≤2 children                      | 62 (79.5%)   | 114 (76.5%)  | 87 (73.1%)   | 79 (74.5%)   | 342 (75.7%)  |
|                                            | ≥3 or more                       | 16 (20.5%)   | 35 (23.5%)   | 32 (26.9%)   | 27 (25.5%)   | 110 (24.3%)  |
| Youngest child age <sup>b</sup> NS         |                                  | 5.50 (4.27)  | 5.93 (4.07)  | 4.81 (3.34)  | 5.24 (3.36)  | 5.40 (3.78)  |
| <b>Work-related Variables</b>              |                                  |              |              |              |              |              |
| Occupational Type <sup>a</sup> ***         | Manager/Administrator            | 13 (16.7%)   | 15 (10.1%)   | 11 (9.2%)    | 5 (4.7%)     | 44 (9.7%)    |
|                                            | Professional                     | 46 (59.0%)   | 34 (22.8%)   | 31 (26.1%)   | 34 (32.1%)   | 145 (32.1%)  |
|                                            | Trades person                    | 6 (7.7%)     | 27 (18.1%)   | 26 (21.8%)   | 9 (8.5%)     | 68 (15.0%)   |
|                                            | Clerical/service worker          | 2 (2.6%)     | 11 (7.4%)    | 12 (10.1%)   | 6 (5.7%)     | 31 (6.9%)    |
|                                            | Labourer or related worker       | 2 (2.6%)     | 21 (14.1%)   | 13 (10.9%)   | 6 (5.7%)     | 42 (9.3%)    |
|                                            | Other                            | 9 (11.5%)    | 41 (27.5%)   | 26 (21.8%)   | 46 (43.4%)   | 122 (27.0%)  |
| Work Hours <sup>a</sup> *                  | Work 40 hour or less per week    | 18 (23.1%)   | 49 (32.9%)   | 19 (16.0%)   | 22 (20.8%)   | 108 (23.9%)  |
|                                            | Work more than 40 hours per week | 60 (76.9%)   | 100 (67.1%)  | 100 (84.0%)  | 84 (79.2%)   | 344 (76.1%)  |
| Employment Type <sup>a</sup> ***           | Permanent                        | 67 (85.9%)   | 134 (89.9%)  | 108 (90.8%)  | 79 (74.5%)   | 388 (85.8%)  |
|                                            | Not permanent                    | 11 (14.1%)   | 15 (10.1%)   | 11 (9.2%)    | 27 (25.5%)   | 64 (14.2%)   |
| Job Quality <sup>a</sup> ***               | High quality                     | 63 (80.8%)   | 96 (64.4%)   | 58 (48.7%)   | 48 (45.3%)   | 265 (58.6%)  |
|                                            | Low quality                      | 15 (19.2%)   | 53 (35.6%)   | 61 (51.3%)   | 58 (54.7%)   | 187 (41.4%)  |
| Work-family conflict (1-5) <sup>b</sup> ** |                                  | 3.22 (.79)   | 3.28 (.79)   | 3.48 (.66)   | 3.58 (.67)   | 3.39 (.74)   |
| <b>Health &amp; Wellbeing</b>              |                                  |              |              |              |              |              |
| Distress Symptoms (10-50) <sup>b</sup> NS  |                                  | 19.95 (8.29) | 19.59 (7.63) | 20.13 (8.39) | 21.70 (8.99) | 20.29 (8.29) |

<sup>a</sup> N (% within the column); Pearson Chi-Square test. <sup>b</sup> Mean (SD); One-way ANOVA. \* $p < 0.05$ ; \*\* $p < 0.01$ ; \*\*\* $p < 0.001$ . NS not significantly associated.

Table S2 The results of univariate analyses on differences between different types of workers for mothers.

|                                            |                                  | No shift     | Regular      | Rotating     | Irregular    | Total        |
|--------------------------------------------|----------------------------------|--------------|--------------|--------------|--------------|--------------|
| Total number of workers                    |                                  | 264 (34.9%)  | 209 (27.6%)  | 90 (11.9%)   | 193 (25.5%)  | 756 (100.0%) |
| <b>Demographic Variables</b>               |                                  |              |              |              |              |              |
| Single Parents <sup>a</sup> NS             | Married parents                  | 226 (85.6%)  | 165 (78.9%)  | 74 (82.2%)   | 149 (77.2%)  | 614 (81.2%)  |
|                                            | Single parents                   | 38 (14.4%)   | 44 (21.1%)   | 16 (17.8%)   | 44 (22.8%)   | 142 (18.8%)  |
| Income <sup>a</sup> ***                    | ≥\$800/week                      | 218 (82.6%)  | 129 (61.7%)  | 66 (73.3%)   | 126 (65.3%)  | 539 (71.3%)  |
|                                            | <&800/week                       | 46 (17.4%)   | 80 (38.3%)   | 24 (26.7%)   | 67 (34.7%)   | 217 (28.7%)  |
| Tertiary Education <sup>a</sup> ***        | Bachelor's or higher             | 203 (76.9%)  | 122 (58.4%)  | 58 (64.4%)   | 130 (67.4%)  | 513 (67.9%)  |
|                                            | Below bachelor's                 | 61 (23.1%)   | 87 (41.6%)   | 32 (35.6%)   | 63 (32.6%)   | 243 (32.1%)  |
| Number of Children <sup>a</sup> **         | ≤2 children                      | 213 (80.7%)  | 159 (76.1%)  | 57 (63.3%)   | 132 (68.4%)  | 561 (74.2%)  |
|                                            | ≥3 or more                       | 51 (19.3%)   | 50 (23.9%)   | 33 (36.7%)   | 61 (31.6%)   | 195 (25.8%)  |
| Youngest child age <sup>b</sup> NS         |                                  | 6.48 (5.21)  | 6.39 (5.22)  | 6.03 (5.23)  | 6.91 (5.26)  | 6.51 (5.22)  |
| <b>Work-related Variables</b>              |                                  |              |              |              |              |              |
| Occupational Type <sup>a</sup> ***         | Manager/Administrator            | 35.9 (13.3%) | 9 (4.3%)     | 6 (6.7%)     | 6 (3.1%)     | 56 (7.4%)    |
|                                            | Professional                     | 168 (63.6%)  | 110 (52.6%)  | 56 (62.2%)   | 131 (67.9%)  | 465 (61.5%)  |
|                                            | Trades person                    | 0 (0.0%)     | 3 (1.4%)     | 1 (1.1%)     | 1 (0.5%)     | 5 (0.7%)     |
|                                            | Clerical/service worker          | 42 (15.9%)   | 60 (28.7%)   | 14 (15.6%)   | 25 (13.0%)   | 141 (18.7%)  |
|                                            | Labourer or related worker       | 0 (0.0%)     | 2 (1.0%)     | 1 (1.1%)     | 3 (1.6%)     | 6 (0.8%)     |
|                                            | Other                            | 19 (7.2%)    | 25 (12.0%)   | 12 (13.3%)   | 27 (14.0%)   | 83 (11.0%)   |
|                                            |                                  |              |              |              |              |              |
| Work Hours <sup>a</sup> NS                 | Work 40 hour or less per week    | 170 (64.4%)  | 157 (75.1%)  | 58 (64.4%)   | 136 (70.5%)  | 521 (68.9%)  |
|                                            | Work more than 40 hours per week | 94 (35.6%)   | 52 (24.9%)   | 32 (35.6%)   | 57 (29.5%)   | 235 (31.1%)  |
| Employment Type <sup>a</sup> ***           | Permanent                        | 218 (82.6%)  | 167 (79.9%)  | 77 (85.6%)   | 117 (60.6%)  | 579 (76.6%)  |
|                                            | Not permanent                    | 46 (17.4%)   | 42 (20.1%)   | 13 (14.4%)   | 76 (39.4%)   | 177 (23.4%)  |
| Job Quality <sup>a</sup> ***               | High quality                     | 206 (78.0%)  | 132 (63.2%)  | 44 (48.9%)   | 74 (38.3%)   | 456 (60.3%)  |
|                                            | Low quality                      | 58 (22.0%)   | 77 (36.8%)   | 46 (51.1%)   | 119 (61.7%)  | 300 (39.7%)  |
| Work-family conflict (1-5) <sup>b</sup> NS |                                  | 3.46 (.79)   | 3.43 (.82)   | 3.56 (.75)   | 3.60 (.73)   | 3.50 (.78)   |
| <b>Health &amp; Wellbeing</b>              |                                  |              |              |              |              |              |
| Distress Symptoms (10-50) <sup>b</sup> *   |                                  | 18.31 (6.33) | 20.46 (7.73) | 19.92 (7.55) | 19.65 (7.58) | 19.44 (7.25) |

<sup>a</sup> N (% within the column); Pearson Chi-Square test. <sup>b</sup> Mean (SD); One-way ANOVA. \* $p < 0.05$ ; \*\*  $p < 0.01$ ; \*\*\* $p < 0.001$ . NS not significantly associated.

Table S3 The effect of covariates on psychological distress via work-family conflict (simple mediation model)

|                                                | <i>Total effect</i> |            |                | <i>Direct effect</i> |            |                | <i>Indirect effect</i> |            |                     |
|------------------------------------------------|---------------------|------------|----------------|----------------------|------------|----------------|------------------------|------------|---------------------|
|                                                | <i>Effect</i>       | <i>SE</i>  | <i>t</i>       | <i>Effect</i>        | <i>SE</i>  | <i>t</i>       | <i>Effect</i>          | <i>SE</i>  | <i>95%CI</i>        |
| <i>Single parents</i> <sup>a</sup>             | <b>2.89</b>         | <b>.60</b> | <b>4.84***</b> | <b>1.83</b>          | <b>.57</b> | <b>3.20**</b>  | <b>1.05</b>            | <b>.21</b> | <b>.66 – 1.49</b>   |
| <i>Number of children</i> <sup>b</sup>         | <b>1.11</b>         | <b>.50</b> | <b>2.22*</b>   | .61                  | .48        | 1.27           | <b>.50</b>             | <b>.17</b> | <b>.19 – .84</b>    |
| <i>Income</i> <sup>c</sup>                     | .79                 | .64        | 1.24           | 1.12                 | .61        | 1.84†          | -.33                   | .21        | -.75 – .08          |
| <i>Part-time work</i> <sup>d</sup>             | -1.41               | .80        | -1.77†         | -.47                 | .76        | -.62           | <b>-.94</b>            | <b>.29</b> | <b>-1.54 – -.38</b> |
| <i>Over-time work</i> <sup>e</sup>             | .83                 | .50        | 1.67†          | .58                  | .47        | 1.21           | .26                    | .16        | -.05 – .57          |
| <i>Trades person</i> <sup>f</sup>              | -1.52               | 1.17       | -1.30          | -1.06                | 1.11       | -.95           | -.46                   | .36        | -1.21 – .22         |
| <i>Professional</i> <sup>g</sup>               | -1.02               | .83        | -1.24          | <b>-1.73</b>         | <b>.79</b> | <b>-2.20*</b>  | <b>.71</b>             | <b>.26</b> | <b>.20 – 1.23</b>   |
| <i>Clerical or service worker</i> <sup>h</sup> | .30                 | .99        | .30            | -.45                 | .94        | -.48           | <b>.75</b>             | <b>.33</b> | <b>.14 – 1.42</b>   |
| <i>Labourer</i> <sup>i</sup>                   | -.77                | 1.34       | -.58           | -.57                 | 1.27       | -.45           | -.20                   | .43        | -1.01 – .68         |
| <i>Other</i> <sup>j</sup>                      | -.42                | .94        | -.44           | -.64                 | .90        | -.72           | .23                    | .29        | -.34 – .82          |
| <i>Job quality</i> <sup>k</sup>                | <b>2.45</b>         | <b>.49</b> | <b>5.04***</b> | <b>1.82</b>          | <b>.46</b> | <b>3.91***</b> | <b>.63</b>             | <b>.16</b> | <b>.32 – .94</b>    |
| <i>Permanent position</i> <sup>l</sup>         | -.21                | .59        | -.35           | .01                  | .56        | .02            | -.22                   | .20        | -.63 – .16          |

<sup>a</sup> Single parents: 0 = married parents, 1 = single parents; <sup>b</sup> Number of children: 0 = 2 children or less; 1 = 3 or more children; <sup>c</sup> Income: 0 = more than \$800/week or prefer not to say, 1 = less than \$800/week; <sup>d</sup> Part-time work: 0 = work more than 20 hours/week, 1 = work less than 20 hours/week; <sup>e</sup> Over-time work: 0 = work less than 40 hours/week, 1 = work more than 40 hours/week; <sup>f</sup> Trades person: 0 = any other occupation, 1 = Trades person; <sup>g</sup> Professional: 0 = any other occupation, 1 = Professional; <sup>h</sup> Clerical or service worker: 0 = any other occupation, 1 = Clerical or service worker; <sup>i</sup> Labourer: 0 = any other occupation, 1 = labourer; <sup>j</sup> Other: 0 = Managers/Administrators, Trades person, Professional, Clerical or service worker, or Labourer; 1 = other occupations; <sup>k</sup> Job quality: 0 = high quality, 1 = low quality; <sup>l</sup> Permanent position: 0 = permanent position, 1 = not permanent position.

†  $p < 0.1$ ; \*  $p < 0.05$ ; \*\*  $p < 0.01$ ; \*\*\*  $p < 0.001$

Table S4 The effect of covariates on psychological distress via work-family conflict, conditional on genders (moderated-mediation model)

| <i>Conditional Direct effect</i>              |                |                |                   |                |                |                     |                                                |               |              |
|-----------------------------------------------|----------------|----------------|-------------------|----------------|----------------|---------------------|------------------------------------------------|---------------|--------------|
|                                               | <i>Effect</i>  | <i>Fathers</i> |                   |                | <i>Mothers</i> |                     |                                                |               |              |
|                                               |                | <i>SE</i>      |                   | <i>t</i>       | <i>Effect</i>  | <i>SE</i>           |                                                | <i>t</i>      |              |
| <i>Single parents<sup>a</sup></i>             | <b>1.65</b>    | <b>.67</b>     |                   | <b>2.45*</b>   | .45            | 1.72                |                                                | .26           |              |
| <i>Number of children<sup>b</sup></i>         | .49            | .60            |                   | .82            | .09            | 1.42                |                                                | .06           |              |
| <i>Income<sup>c</sup></i>                     | .45            | .66            |                   | .68            | <b>-3.70</b>   | <b>1.70</b>         |                                                | <b>-2.18*</b> |              |
| <i>Part-time work<sup>d</sup></i>             | -.55           | .79            |                   | -.69           | -2.55          | 2.73                |                                                | -.94          |              |
| <i>Over-time work<sup>e</sup></i>             | .71            | .60            |                   | 1.18           | 2.22           | 1.40                |                                                | 1.58          |              |
| <i>Trades person<sup>f</sup></i>              | -1.53          | 3.28           |                   | -.47           | -1.47          | 6.50                |                                                | -.23          |              |
| <i>Professional<sup>g</sup></i>               | -1.49          | .86            |                   | -1.74†         | -1.28          | 1.52                |                                                | -.84          |              |
| <i>Clerical or service worker<sup>h</sup></i> | -.35           | .99            |                   | -.35           | .43            | 2.04                |                                                | -.21          |              |
| <i>Labourer<sup>i</sup></i>                   | -4.65          | 3.00           |                   | -1.55          | -8.79          | 5.98                |                                                | -1.47         |              |
| <i>Other<sup>j</sup></i>                      | -.70           | 1.11           |                   | -.63           | -.33           | 2.02                |                                                | -.16          |              |
| <i>Job quality<sup>k</sup></i>                | <b>1.45</b>    | <b>.57</b>     |                   | <b>2.52*</b>   | .63            | 1.29                |                                                | .49           |              |
| <i>Permanent position<sup>l</sup></i>         | -.58           | .65            |                   | -.89           | -2.80          | 1.57                |                                                | -1.78†        |              |
| <i>Conditional Indirect effect</i>            |                |                |                   |                |                |                     |                                                |               |              |
|                                               | <i>Fathers</i> |                |                   | <i>Mothers</i> |                |                     | <i>Differences between fathers and mothers</i> |               |              |
|                                               | <i>Effect</i>  | <i>SE</i>      | <i>95%CI</i>      | <i>Effect</i>  | <i>SE</i>      | <i>95%CI</i>        | <i>Index</i>                                   | <i>SE</i>     | <i>95%CI</i> |
| <i>Single parents<sup>a</sup></i>             | <b>1.09</b>    | <b>.39</b>     | <b>.33 – 1.85</b> | <b>1.00</b>    | <b>.24</b>     | <b>.53 – 1.48</b>   | -.09                                           | .44           | -.93 – .77   |
| <i>Number of children<sup>b</sup></i>         | .40            | .26            | -.10 – .93        | <b>.56</b>     | <b>.21</b>     | <b>.16 – .98</b>    | .17                                            | .33           | -.47 – .81   |
| <i>Income<sup>c</sup></i>                     | -.68           | .43            | -1.51 – .15       | -.30           | .23            | -.76 – .15          | .38                                            | .46           | -.51 – 1.29  |
| <i>Part-time work<sup>d</sup></i>             | -1.48          | 1.27           | -3.96 – 1.02      | <b>-.93</b>    | <b>.28</b>     | <b>-1.52 – -.39</b> | .54                                            | 1.27          | -2.02 – 3.03 |
| <i>Over-time work<sup>e</sup></i>             | .49            | .28            | -.05 – 1.07       | .30            | .20            | -.09 – .72          | -.19                                           | .34           | -.86 – .48   |
| <i>Trades person<sup>f</sup></i>              | -.29           | .38            | -1.05 – .45       | -.71           | 1.07           | -2.96 – 1.31        | -.42                                           | 1.09          | -2.71 – 1.70 |
| <i>Professional<sup>g</sup></i>               | <b>.75</b>     | <b>.34</b>     | <b>.10 – 1.46</b> | <b>.62</b>     | <b>.29</b>     | <b>.08 – 1.22</b>   | -.12                                           | .32           | -.75 – .51   |
| <i>Clerical or service worker<sup>h</sup></i> | <b>1.43</b>    | <b>.57</b>     | <b>.34 – 2.58</b> | .54            | .33            | -.09 – 1.20         | -.90                                           | .56           | -2.00 – .18  |
| <i>Labourer<sup>i</sup></i>                   | -.20           | .48            | -1.15 – .76       | .83            | .65            | -.38 – 2.16         | 1.02                                           | .73           | -.35 – 2.54  |
| <i>Other<sup>j</sup></i>                      | .00            | .34            | -.67 – .65        | .70            | .38            | -.04 – 1.44         | .70                                            | .38           | -.05 – 1.45  |
| <i>Job quality<sup>k</sup></i>                | <b>.67</b>     | <b>.23</b>     | <b>.23 – 1.13</b> | <b>.64</b>     | <b>.21</b>     | <b>.24 – 1.06</b>   | -.03                                           | .29           | -.61 – .53   |
| <i>Permanent position<sup>l</sup></i>         | -.14           | .39            | -.91 – .63        | -.27           | .23            | -.72 – .17          | -.13                                           | .43           | -.99 – .74   |

<sup>a</sup> Single parents: 0 = married parents, 1 = single parents; <sup>b</sup> Number of children: 0 = 2 children or less; 1 = 3 or more children; <sup>c</sup> Income: 0= more than \$800/week or prefer not to say, 1 = less than \$800/week; <sup>d</sup> Part-time work: 0 = work more than 20 hours/week, 1 = work less than 20 hours/week; <sup>e</sup> Over-time work: 0 = work less than 40 hours/week, 1 = work more than 40 hours/week; <sup>f</sup> Trades person: 0 = any other occupation, 1 = Trades person; <sup>g</sup> Professional: 0 = any other occupation, 1 = Professional; <sup>h</sup> Clerical or service worker: 0= any other occupation, 1 = Clerical or service worker; <sup>i</sup> Labourer: 0= any other occupation, 1 = labourer; <sup>j</sup> Other: 0 = Managers/Administrators, Trades person, Professional, Clerical or service worker, or Labourer; 1 = other occupations; <sup>k</sup> Job quality: 0=high quality, 1=low quality; <sup>l</sup> Permanent position: 0= permanent position, 1= not permanent position.

Bold for significance. †  $p < 0.1$ ; \* $p < 0.05$ ;
